# Supplementary material
Source: PubMed Central journal article supplement (PMC2527122)
Supplement: supp_M802043200_Suppl_Fig_1.pdf [file supp_M802043200_Suppl_Fig_1.pdf]

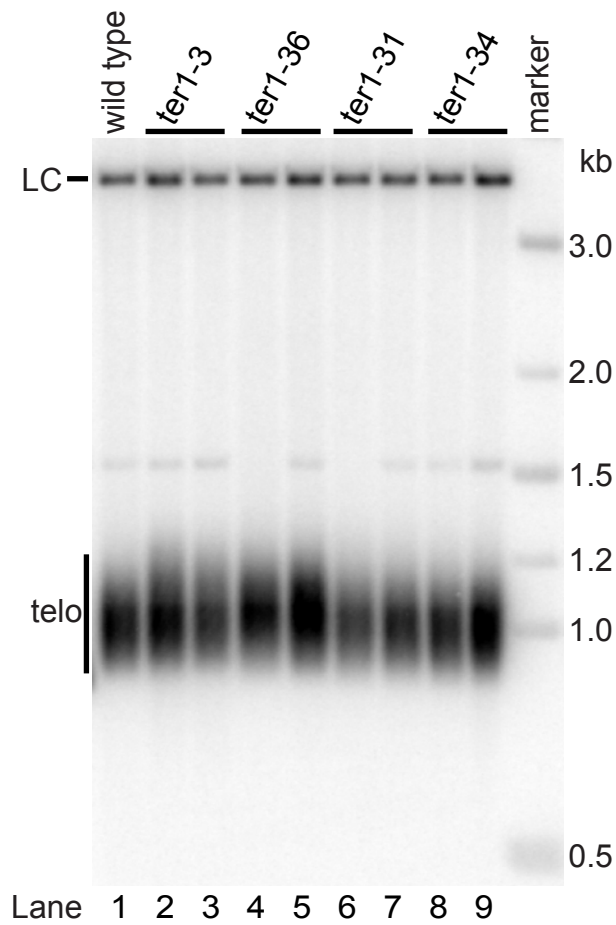

Box, et al.; Suppl. Figure 1

Telomere length is unaffected by several destabilizing mutations in the boundary element. Genomic DNA was digested with EcoRI, separated on a 1% TBE/agarose gel and transferred to a nylon membrane. Telomeric restriction fragments were visualized with a 300 bp telomeric probe, rad16 was used as loading control (LC).
